# Supplementary material for: Diversity of Symbiodiniaceae in 15 Coral Species From the Southern South China Sea: Potential Relationship With Coral Thermal Adaptability
Source: Front Microbiol. 2019 Oct 18;10:2343. doi: 10.3389/fmicb.2019.02343 (PMC6813740; doi:10.3389/fmicb.2019.02343)
Supplement: Supplementary file 2 [file Table_2.XLSX]

## Sheet: Table S6
type	Poc1	Poc2	Poc3	Poc4	Acr1	Acr2	Acr3	Fav1	Fav2	Fav3	Fat1	Fat2	Fat3	Gon1	Gon2	Gon3	Dip1	Dip2	Dip3	Pla1	Pla2	Pla3	Mer1	Mer2	Mer3	Por1	Por2	Por3	Mon1	Mon2	Mon3	Mon4	Mon5	Hyd1	Hyd2	Hyd3	Cos1	Cos2	Cos3	Pav1	Pav2	Pav3	Ech1	Ech2	Ech3	Fun1	Fun2	Fun3
D1	23573	44875	12885	32489	5	1	1	2	0	65	0	3	0	0	0	98	0	12	1	45	0	0	1	0	1	2	0	0	3	1	2	1	0	1	1	2	3	0	66	1	16077	8	0	0	0	0	0	0
D1a	10871	13	3113	4	1	2	0	0	1	5	0	0	0	0	0	23	0	8	0	12	0	0	0	0	0	1	0	0	0	0	1	0	0	0	0	0	0	0	18	0	6504	0	0	0	0	0	0	0
D2	190	1	130	6638	0	1	0	0	0	0	0	0	0	0	1	9	0	0	0	1	0	0	0	0	0	0	0	0	0	1	1	0	0	0	0	0	0	0	0	0	115	11	0	0	0	0	0	0
D6	1205	7	3738	8	1	0	0	0	0	23	0	0	0	0	0	6	0	0	0	0	0	0	0	0	0	0	0	0	0	0	0	0	0	0	0	0	1	0	0	0	948	0	0	0	0	0	0	0
C40	3	725	2303	107	15	185	105	12	90	4	6	6	66	5	5	11	43	7	3	3	374	11	43	51	15	87	0	9	64	37	189	15	5	30015	49059	19024	24060	26314	36874	9	57	4	26893	32043	48556	0	56	7
D2.2	645	4	1735	5	0	0	0	0	0	1	0	0	0	0	0	7	0	0	0	0	0	0	0	0	0	0	0	0	0	0	0	0	0	0	0	0	0	0	0	0	194	0	0	0	0	0	0	0
C1	7	35	1772	33	28	78	51	34	71	37	479	51	27	55	47	81	41	96	76	41	32	49	90	26	46	28	1	0	44	16	59	2	1	144	254	83	96	120	192	25	93	14	108	72	169	18	35	74
C3u	59	523	101	56	23942	12407	18719	17937	29723	21490	28924	20254	40004	16932	16904	24474	23190	16515	31209	26546	21727	27190	35403	23041	42581	83	25	29	42	126	37	117	16	47	208	27	5531	3937	5553	13	350	2310	5	22	42	13	27	281
Cspc	15	231	557	27	10430	12485	5085	7059	7567	5617	11497	4957	1265	8139	4339	6347	5014	8769	7813	4461	4594	11329	8253	3361	6652	31	12	4	29	30	49	36	3	3620	5983	1740	2922	5233	6451	13	772	904	3125	2740	4285	1334	2477	1793
C91	9	50	220	24	6591	7034	2777	4491	4066	2904	1549	2618	3847	2558	2534	6118	9333	6706	9436	2424	2250	5195	4952	3410	4277	45	24	23	32	20	76	39	7	38	112	13730	1428	4229	1482	16	83	447	6	48	42	3	34	44
C3w	1	19	45	3	3427	6179	1849	2450	2092	1355	850	940	2502	2034	815	1488	4876	2053	5713	1297	904	2358	2559	1796	2240	3	1	0	0	0	3	0	0	367	562	205	335	1107	700	1	94	28	264	225	511	101	130	135
C115	6	43	80	9	4503	615	1205	2789	2353	1864	3184	1890	3023	1605	1993	2217	2665	1493	3660	1379	1491	3715	2899	2253	3910	4	0	4	8	7	7	9	2	1107	1635	650	1273	1503	1893	2	53	306	814	1003	1565	23	43	102
C3d	0	36	43	5	1853	2128	832	1096	804	685	918	365	346	982	797	724	801	1082	1081	475	722	1427	1192	460	902	64	4	0	2	17	0	1	2	662	771	262	309	864	1479	5	1395	114	421	504	654	2843	6078	4467
C116	2	1	2	0	0	1	0	1	0	1919	0	5	2	2	11775	0	0	1	1	0	42	0	40	1	0	2379	81	98	13	35	91	11	84	1	2	2	0	0	1	34	6740	28	0	0	0	0	2	74
C50	0	8	7	1	259	626	174	168	288	163	1409	111	2	208	243	647	617	323	1014	108	143	121	282	374	611	1	0	0	0	0	0	0	2	7	18	4	139	443	130	0	0	15	4	2	4	1	1	0
C54a	0	0	0	1	282	757	239	196	211	158	73	91	8	180	109	156	899	204	759	172	99	169	352	327	364	0	0	0	0	0	0	1	0	0	4	0	33	185	30	0	2	11	1	0	1	0	0	0
G3	262	1	0	0	0	0	0	21	0	0	2	0	0	843	0	49	0	20	0	0	3703	0	4332	0	0	2755	0	1	1	0	0	0	0	6130	0	1	301	0	19	19	0	2	0	200	1	0	1	0
C1_#	0	2	7	0	0	0	0	3	2	3	0	4	0	0	5	0	860	1	34	0	7	0	0	4	7	50	1879	885	8	15	951	14	12	0	0	1	0	11	3	473	5	24664	0	0	0	1	0	3
C15	51	812	584	47	19	16	21	4	31	126	2	502	4	12	566	20	14	25	5	13	347	25	31	57	83	41200	44518	36454	35883	39884	28108	27919	35219	9	16	72	9	55	153	35708	196	15508	8	8	16	1	9	57
C15h	0	14	4	3	1	0	2	0	3	4	0	11	0	0	5	0	28	0	1	0	11	0	0	2	7	808	378	924	15	35	6	1767	40	0	1	1	0	1	0	18	1	4761	0	0	1	0	0	0
C15f	0	0	0	0	0	0	1	0	0	0	0	0	0	0	0	1	0	0	0	0	0	0	3	0	0	0	0	0	2293	2331	0	318	0	0	0	0	0	0	0	1	1	0	0	0	0	0	0	0
C27	11	10	15	1	1	3	1	14	11	37	0	0	18	4	16	12	74	1	7	1	33	2	1	6	17	8	7	4	2	2	5	0	3	4	3	2	1	20	8159	1	14889	102	0	8	12	35435	53443	45374
C15.6	0	8	32	0	5	12	2	4	4	50	0	88	9	3	144	1	528	5	20	5	46	6	9	24	17	80	160	105	24	72	3586	17	856	0	0	3	2	9	5	2240	18	734	0	1	0	0	0	0
C15i	0	0	21	1	1	0	0	0	0	0	0	0	0	0	0	0	0	0	0	0	0	0	0	0	0	54	21	19	65	66	10	11	9	0	0	0	2	0	5	1488	14	9	0	1	0	0	0	0
C93_(type_1)	1	6	156	4	27	23	15	6	27	224	19	86	6	18	1157	26	931	27	81	11	39	23	23	51	37	59	24	9	36	34	21	12	6	3	8	12	7	29	26	21	138	561	5	10	8	5	5	5
C3.12	0	7	44	1	275	634	161	189	225	172	396	95	43	183	114	102	286	221	322	112	123	266	242	105	180	4	0	0	1	2	5	0	0	47	22	13	29	180	68	0	3	27	12	53	70	0	1	0
C3.10	0	7	9	0	51	67	39	26	66	47	31	39	110	45	71	72	47	41	64	39	27	31	72	45	64	2	0	0	0	0	0	0	0	126	176	90	62	94	142	0	26	5	114	100	154	20	32	58
C3.11	1	0	0	0	111	143	68	69	64	39	63	40	13	90	43	59	39	81	55	43	19	127	55	38	84	5	0	0	1	0	0	1	0	3	4	2	12	23	25	0	3	4	1	1	1	0	3	0
C3b	4	15	23	1	91	216	94	66	164	115	196	101	97	96	108	145	151	142	200	86	72	78	181	69	146	2	0	0	2	0	0	0	0	220	507	135	163	276	406	1	93	3	286	242	413	196	315	269
C44	0	0	23	1	115	133	53	80	61	49	196	33	0	65	52	56	49	75	82	28	62	110	82	38	48	0	0	1	0	0	0	0	0	2	9	0	7	31	7	0	0	14	0	0	0	0	0	0
C18	2	24	497	12	29	68	43	19	57	42	52	42	37	56	25	51	35	30	48	45	27	26	54	32	71	14	0	0	11	2	19	0	0	87	127	54	57	47	95	6	23	4	71	51	84	0	1	0
C119	0	0	2	0	10	39	84	13	3	3	57	11	19	4	2	11	13	6	11	109	100	12	158	7	11	0	0	0	2	0	0	0	0	0	1	3	0	2	9	0	2	0	1	0	0	0	0	0
C7	0	0	4	0	45	40	14	20	15	9	10	10	26	13	16	27	39	19	59	11	14	17	9	19	26	0	0	0	0	0	0	0	0	2	7	11	7	19	38	0	1	0	4	0	9	0	2	2
C42_(type_1)	0	0	0	1	0	0	0	7	0	0	0	0	0	0	0	0	1	0	0	0	0	41	0	0	0	0	0	0	0	0	0	0	0	0	1	0	0	0	0	0	0	17	0	0	0	0	0	0
C21.14	0	0	0	0	2	3	0	1	1	2	0	0	5	0	1	1	0	0	2	0	0	0	5	0	0	0	0	0	0	0	0	0	0	0	1	1	0	1	1	0	4	1	0	1	0	3	9	3
C21.12	0	0	0	0	1	2	0	0	0	1	1	0	0	2	3	0	1	0	3	0	0	0	1	0	0	0	0	0	0	0	0	0	0	0	0	0	0	0	1	0	5	0	0	1	1	0	3	3
C21.11	0	0	0	0	2	1	0	2	0	0	0	0	0	1	1	1	0	0	1	0	0	2	0	0	0	0	0	0	0	0	0	0	0	0	0	0	0	0	1	0	0	2	0	2	0	2	1	2
C21.16	0	0	1	0	0	1	1	0	1	0	1	1	1	0	0	0	1	1	0	0	0	0	0	0	0	0	0	0	0	0	0	0	0	0	2	1	1	0	0	0	0	0	1	0	0	2	6	2
C1m(type2)	0	1	0	0	1	0	0	0	0	0	0	0	0	0	0	0	0	0	0	0	0	0	0	0	0	0	0	0	0	0	0	0	0	0	0	0	0	0	0	0	0	0	0	0	0	0	0	0
F3.1	0	0	0	0	0	0	0	0	0	0	0	0	0	0	0	0	0	0	0	0	0	0	0	0	0	1	0	0	0	0	0	0	0	0	0	0	0	0	0	0	0	0	0	0	0	0	0	0
C39	0	0	0	0	0	0	0	1	0	0	0	0	0	0	0	0	0	1	0	0	0	0	0	0	0	0	3	3	0	0	0	0	26	0	0	0	0	1	0	0	1	83	0	1	0	0	0	0
C38	0	0	0	0	1	5	0	4	1	1	2	1	1	4	1	0	1	3	4	1	0	3	9	1	3	0	0	0	0	0	0	0	0	2	1	1	1	1	0	0	0	0	0	1	0	1	2	1
C37	0	0	0	0	0	0	0	0	0	0	0	0	0	0	0	0	0	0	0	0	0	0	0	0	0	0	0	0	0	0	0	0	0	0	0	0	0	0	0	0	0	0	0	0	0	0	0	0
C36	0	0	2	0	7	10	8	4	5	2	8	2	2	6	0	4	4	6	9	2	9	14	9	2	9	0	0	0	0	0	0	0	0	3	2	7	2	21	7	0	1	0	2	3	2	0	0	1
C106a	0	0	2	0	0	0	0	0	0	0	0	0	0	0	0	0	0	0	0	0	0	0	0	0	0	0	0	0	0	0	1	0	0	0	0	0	0	0	0	0	0	0	0	0	0	0	0	0
C32	0	0	0	0	0	0	0	0	0	0	0	0	0	0	0	0	0	0	0	0	0	0	0	0	1	0	0	0	0	0	0	0	0	0	0	0	1	1	0	0	0	0	0	0	0	0	0	0
C1.6	2	0	263	6	6	2	6	4	0	5	4	1	0	9	2	7	2	13	1	2	8	9	40	0	0	0	0	0	0	1	0	0	0	33	9	7	1	2	2	0	3	0	1	3	1	0	0	2
C1.7	0	0	0	0	0	1	1	3	1	0	4	0	1	0	1	2	7	2	0	0	0	3	1	0	2	0	0	0	0	1	0	0	0	2	1	0	0	1	1	0	0	0	0	0	1	0	1	0
C1.5	0	0	1	0	3	0	0	1	2	2	4	1	0	0	1	1	2	1	0	2	1	2	0	0	0	0	0	0	0	0	0	0	0	1	2	2	0	0	0	0	0	0	0	0	0	0	0	0
C3.7	0	0	2	0	6	16	4	7	6	9	15	6	1	11	5	1	5	13	12	4	4	14	9	2	6	0	0	0	0	0	0	0	0	4	10	4	2	5	7	0	1	2	1	0	1	2	4	1
C3.2	0	0	7	1	1	1	0	0	0	0	0	0	0	0	0	0	2	26	2	1	0	3	0	0	0	0	0	0	0	2	0	0	0	2	0	0	0	5	3	0	0	0	0	1	1	0	0	0
C3ha	0	0	0	0	1	2	0	1	1	0	1	1	0	2	3	0	2	0	0	0	0	1	0	0	0	0	0	0	0	0	0	0	0	0	0	0	0	0	1	0	13	0	0	0	0	0	1	1
C3.8	0	1	1	0	5	4	3	1	3	1	2	3	4	5	1	6	10	2	6	2	7	7	8	5	2	0	0	0	0	0	0	0	0	0	4	2	2	8	4	0	1	1	2	3	3	0	0	1
C35_(type_3)	0	0	0	0	0	12	9	0	1	0	1	0	0	1	0	1	10	1	1	10	8	0	11	2	1	0	0	0	0	0	0	0	0	0	0	0	0	21	1	0	0	0	0	1	0	0	0	0
C27.1	0	0	0	0	0	0	0	0	0	0	0	0	0	0	0	0	0	0	0	0	0	0	0	0	0	0	0	0	0	0	0	0	0	0	0	0	0	0	5	0	10	0	0	0	0	19	15	43
C23	0	0	1	0	0	0	0	0	0	0	0	0	0	0	0	0	0	0	0	0	0	0	0	0	0	0	0	0	0	0	0	0	0	0	0	0	0	0	0	0	0	0	1	0	0	0	0	0
C20	0	0	0	0	0	0	0	0	0	1	1	0	1	0	0	0	0	1	0	0	0	0	0	0	0	0	0	0	0	0	0	0	0	0	0	0	0	1	0	0	0	0	0	0	0	0	0	0
C3n	0	0	0	0	1	2	2	0	0	0	0	0	0	0	0	0	0	1	0	0	0	1	0	0	0	0	0	0	0	0	0	0	0	0	0	0	0	2	0	0	0	2	0	0	0	0	0	0
C1ca	0	15	49	7	1	0	0	0	3	0	5	0	0	1	3	0	0	120	2	0	4	32	1	3	0	0	0	0	0	6	3	0	1	4	38	0	1	6	47	0	0	0	0	0	0	2	0	0
C24	0	0	0	0	0	0	0	0	0	0	0	0	0	0	0	0	0	1	0	0	0	0	0	0	0	0	0	0	0	0	0	0	0	0	1	0	0	0	0	0	0	0	0	0	0	0	0	0
C3j	0	5	18	0	7	15	2	3	5	2	3	0	1	8	2	3	4	5	7	2	3	8	1	1	3	0	0	0	1	0	0	0	0	2	2	2	0	3	2	0	0	0	1	1	0	1	1	0
C3e	14	21	262	27	18	27	5	13	17	11	5	4	3	11	5	11	4	11	7	10	4	10	12	3	6	0	0	0	0	0	0	0	0	4	10	12	1	4	7	1	30	0	3	3	3	1	3	4
C3g	0	0	0	0	0	0	0	0	0	0	0	0	0	0	0	0	0	0	0	0	0	0	0	0	0	0	0	0	0	0	0	0	0	0	0	0	0	0	1	0	0	0	0	1	0	0	0	0
C29	0	0	2	0	7	21	17	3	4	4	1	1	3	5	2	4	3	3	6	15	12	3	42	5	8	0	0	0	0	0	0	0	0	1	4	90	10	6	2	0	1	0	1	2	3	2	2	1
C3a	0	0	6	0	9	15	6	20	11	2	4	2	10	5	3	9	9	10	7	3	6	2	5	11	12	0	0	0	0	0	1	0	0	2	4	19	10	19	20	1	0	0	4	5	12	1	2	1
C3y	0	0	2	0	4	9	5	3	4	2	9	1	0	6	3	1	3	51	4	1	2	7	8	4	8	0	0	0	0	0	0	0	0	3	6	2	2	4	6	0	0	0	1	0	5	2	0	3
C3z	0	0	3	0	65	43	12	21	8	10	17	10	31	11	10	7	19	13	31	8	3	18	15	13	9	0	0	0	0	0	0	0	0	8	8	0	1	17	9	0	0	2	2	6	11	3	2	2
C3t	0	0	0	0	4	7	0	1	2	1	1	1	0	3	3	4	0	2	6	2	1	2	1	1	2	0	0	0	0	0	0	0	0	0	2	0	2	1	3	0	1	1	2	1	1	1	0	1
C3p	0	0	0	0	0	0	0	0	0	0	0	0	0	0	0	1	0	0	0	0	0	0	0	0	0	0	0	0	0	0	0	0	0	0	0	1	0	0	0	0	0	0	0	0	0	0	0	0
C15.2_(type_2)	0	0	0	0	0	0	0	0	0	0	0	0	0	0	0	0	0	0	0	0	0	0	0	0	0	99	46	7	1	3	1	6	3	0	0	0	0	1	0	1	0	3	0	0	0	0	0	0
C15L	0	6	9	0	0	1	0	0	0	0	0	3	0	0	0	0	0	0	0	0	3	0	0	0	0	33	30	300	40	40	22	18	80	0	0	0	0	0	0	10	1	67	0	0	0	0	0	0
C56a	0	0	0	0	0	0	0	0	0	0	0	0	0	0	0	0	0	0	0	0	0	0	0	0	0	10	9	8	9	6	9	6	5	0	0	0	0	0	0	7	0	3	0	0	0	0	0	0
C40a	0	0	9	1	0	0	0	0	2	0	0	0	0	0	0	1	0	0	0	0	0	0	0	0	0	0	0	0	0	0	1	0	0	9	9	8	13	19	24	0	0	0	7	13	32	1	2	0
C15b	0	1	0	0	0	0	0	0	0	0	0	0	0	0	0	0	7	0	0	0	0	0	0	1	0	40	36	32	36	27	9	33	30	0	0	1	0	0	0	25	0	45	0	0	0	0	0	0
C15a	0	8	179	7	3	4	1	0	3	34	0	15	0	0	288	2	193	4	7	0	9	1	1	7	2	89	36	26	47	40	36	20	46	2	9	9	1	32	21	30	438	177	4	7	7	0	6	17
C15g	0	0	0	0	0	0	0	0	0	1	0	0	0	0	0	0	0	0	0	0	19	0	0	0	0	28	32	75	24	26	20	23	16	0	0	0	0	0	1	32	0	103	0	0	0	0	0	0
C15e	0	0	0	0	0	0	0	0	0	0	0	3	0	0	0	0	0	0	0	0	0	0	0	0	0	0	0	0	0	0	0	0	0	0	0	0	0	0	0	0	0	0	0	0	0	0	0	0
C15d	0	0	0	0	0	0	0	0	0	0	0	0	0	0	0	0	0	0	0	0	0	0	0	0	0	0	0	2	0	0	0	0	0	0	0	0	0	0	0	0	0	1	0	0	0	0	0	0
C15k	0	0	0	0	0	0	0	0	0	0	0	0	0	0	0	0	0	0	0	0	0	0	0	0	0	0	0	1	0	3	0	1	0	0	0	0	0	0	0	0	0	0	0	0	0	0	0	0
C15j	0	0	0	1	0	0	0	0	0	0	0	4	0	0	0	0	0	0	0	0	0	0	0	0	1	14	15	19	9	21	9	15	26	0	0	0	0	0	0	13	0	32	0	0	0	0	0	0
C15m	0	0	3	0	0	0	0	0	0	1	0	2	0	0	0	0	0	0	0	0	0	0	0	0	0	16	31	11	12	9	3	76	11	0	0	0	0	0	0	91	0	71	0	0	0	0	0	0
C56	0	0	0	0	0	0	0	0	0	0	0	0	0	0	0	0	0	0	0	0	0	0	0	0	1	0	0	0	0	0	0	0	0	0	0	0	0	0	0	0	0	6	0	0	0	0	0	0
C55	0	0	0	0	0	0	0	0	0	0	0	0	0	0	0	0	0	0	0	0	0	0	0	0	0	0	0	0	0	0	0	0	1	0	0	21	0	0	0	0	0	0	0	0	0	0	0	0
C45.3	0	0	1	0	0	0	0	1	0	0	0	0	0	0	0	0	0	1	0	0	0	1	0	0	0	0	0	0	0	0	0	0	0	1	1	0	0	2	0	1	0	0	0	0	0	0	0	0
C58	0	0	0	0	0	0	0	21	0	0	0	0	0	0	0	0	0	0	0	0	0	36	0	0	0	0	0	0	0	0	0	0	0	0	0	0	0	0	0	0	0	0	0	0	0	0	0	0
C15c	0	0	0	0	0	0	0	0	0	0	0	0	0	0	0	0	0	0	0	0	3	0	0	0	0	3	6	7	9	14	4	13	11	0	0	0	0	0	1	6	0	704	0	0	0	0	0	0
C21a	0	0	7	0	1	2	1	1	0	1	1	1	0	1	1	2	1	3	0	1	0	4	2	0	1	0	0	0	0	0	0	0	0	0	2	0	1	3	2	0	3	0	0	1	1	3	21	4
A1.1	0	0	0	0	0	0	0	0	0	0	0	0	0	0	0	0	0	0	0	0	0	0	0	0	0	0	0	0	0	0	0	0	0	1	0	0	0	0	0	0	0	0	0	0	0	0	0	0
C3aa	1	0	0	0	43	4	4	36	8	4	3	4	11	3	1	5	4	3	13	6	4	53	7	5	5	0	0	0	0	0	1	0	0	0	0	0	0	2	0	0	0	5	0	0	0	0	0	1
C40b	0	0	0	0	0	0	0	0	0	0	0	0	0	0	0	0	0	0	0	0	0	0	0	0	0	0	0	0	0	0	0	0	0	0	0	1	0	0	0	0	0	0	0	0	0	0	0	0
C35_(type_1)	0	0	0	0	0	0	0	0	0	0	0	0	0	0	0	0	1	0	0	0	0	0	1	0	0	0	0	0	0	0	0	0	0	0	0	0	0	0	0	0	0	0	0	0	0	0	0	0
C46	0	0	6	0	0	0	0	0	0	0	0	0	0	0	0	0	0	0	0	0	0	0	0	0	0	0	0	0	0	0	0	0	0	0	0	0	0	0	0	0	0	0	0	0	1	0	0	0
C47	0	0	1	0	0	0	0	0	0	0	0	0	0	0	0	0	0	0	0	0	0	0	0	0	0	0	0	0	0	0	0	0	0	0	0	0	0	0	0	0	0	0	0	0	0	0	0	0
C41	0	0	3	0	0	1	1	4	0	0	1	3	0	0	0	1	2	0	1	0	1	0	0	1	0	0	0	0	0	0	0	0	0	1	1	0	0	2	1	0	0	0	1	0	1	0	0	0
C43	0	0	1	0	0	0	0	0	0	0	0	0	0	0	0	0	0	0	0	0	0	0	0	0	0	0	0	0	0	0	0	0	0	0	0	0	0	0	0	0	0	0	0	0	0	0	0	0
C42_(type_2)	0	0	10	1	2	0	2	0	1	1	0	0	0	0	0	1	1	0	0	0	0	0	0	0	0	13	0	0	0	0	1	0	0	82	24	0	0	12	0	0	1	0	0	0	0	0	0	0
C1g	0	0	5	1	9	5	5	1	5	8	8	9	0	8	1	6	2	11	6	1	3	13	5	3	8	0	0	0	0	0	0	0	0	8	8	0	0	3	8	0	0	0	1	2	1	2	5	3
C49	0	0	0	0	0	0	0	0	0	0	0	0	0	0	0	0	0	0	0	0	0	0	0	0	0	0	0	0	0	0	0	0	0	0	0	0	0	0	0	0	0	1	0	0	0	0	0	0
C15.8	0	0	7	0	1	0	0	0	0	1	0	3	0	0	2	0	2	0	0	0	0	0	0	0	1	24	46	300	107	87	54	28	58	0	0	0	0	0	0	257	1	57	0	0	0	0	0	0
C15.9	0	2	3	0	0	0	0	0	0	1	0	3	0	0	2	0	0	0	0	0	0	0	1	0	2	114	65	389	100	79	370	216	208	0	0	0	0	0	0	101	18	19	0	0	0	0	0	0
C15.7	1	0	0	0	0	1	0	0	0	0	0	0	0	0	3	0	1	1	0	0	1	2	0	0	0	464	87	37	34	53	29	26	26	0	0	0	0	0	0	96	0	59	0	0	2	0	0	0
C15.4	0	0	13	1	0	5	1	0	2	14	0	6	1	0	60	2	135	2	7	0	2	1	2	2	1	0	0	0	0	0	6	1	0	0	0	4	0	5	1	1	12	27	0	0	0	0	0	0
C15.5	0	0	0	0	0	0	0	0	0	0	0	0	0	0	0	0	2	0	0	0	0	0	0	0	0	0	0	0	0	0	0	0	0	0	0	0	0	0	0	0	0	0	0	0	0	0	0	0
C15.3	0	0	0	0	0	0	0	0	0	0	0	0	0	0	0	0	0	0	0	0	0	0	0	0	0	0	0	0	0	0	0	0	0	0	0	0	0	0	0	0	0	1	0	0	0	0	0	0
C15.1	0	0	0	0	0	0	0	0	0	0	0	0	0	0	0	0	1	0	0	0	0	0	0	0	1	84	24	18	9	25	14	11	21	0	0	0	0	0	0	14	0	50	0	0	0	0	0	0
C3.14	0	0	0	0	5	11	2	3	2	0	2	0	0	0	0	0	13	2	2	1	5	6	2	7	3	0	0	0	0	0	0	0	0	5	3	0	1	6	3	0	41	0	1	1	2	128	256	112
H6	0	0	0	0	0	0	0	0	0	0	0	0	0	0	0	2	0	0	0	0	0	0	0	0	0	0	0	0	0	0	0	0	0	0	0	0	0	0	0	0	0	0	0	0	0	0	0	0
C17a	0	0	0	0	0	3	1	0	0	0	0	0	0	0	0	0	0	0	0	0	0	0	0	0	0	0	0	0	0	0	0	0	0	2	2	0	0	0	0	0	1	1	0	0	0	2	0	2
C101	0	0	2	0	2	1	0	0	0	0	0	6	0	1	0	2	0	1	0	0	0	1	0	0	0	0	0	0	0	0	0	0	0	0	0	2	0	0	1	0	0	0	0	0	1	0	0	0
C79	0	0	0	0	0	0	0	0	0	0	0	0	0	0	0	0	0	0	0	0	0	0	0	0	0	0	0	0	0	0	0	0	0	0	0	0	0	1	0	0	0	0	0	0	0	0	0	0
C92a	0	0	0	0	0	0	0	0	0	0	0	0	0	0	0	0	0	0	0	0	0	0	0	0	0	0	0	0	0	0	0	0	0	0	0	1	0	0	0	0	0	0	0	0	0	0	0	0
D10	255	25	11	30	0	0	0	0	0	0	0	0	0	0	0	2	0	0	0	0	0	0	0	0	0	0	0	0	0	0	0	0	0	0	0	0	0	0	0	0	93	0	0	0	0	0	0	0
D11	0	0	0	0	0	0	0	0	0	1	0	0	0	0	0	0	0	0	0	0	0	0	0	0	0	0	0	0	0	0	0	0	0	0	0	0	0	0	0	0	0	0	0	0	0	0	0	0
C71	0	0	0	0	4	3	1	4	1	5	2	1	0	0	1	3	2	4	7	1	1	4	4	0	1	2	0	0	0	0	0	0	0	1	3	7	1	2	2	0	0	0	1	0	2	1	0	0
C70	0	0	1	0	9	5	2	6	3	3	5	2	3	6	2	4	8	4	4	2	5	1	5	4	3	1	0	0	0	0	0	0	0	3	3	1	2	9	4	0	1	0	0	2	7	1	1	1
C72	0	0	1	0	0	4	1	1	2	0	3	3	5	0	0	27	11	32	9	0	0	1	4	2	5	0	0	0	0	0	0	0	0	0	0	85	1	1	0	0	1	33	0	0	0	0	0	0
C75	0	0	0	0	2	7	4	0	1	2	0	1	0	0	3	1	10	1	2	1	1	6	2	5	4	0	0	0	0	0	0	0	0	0	1	1	2	11	1	0	0	0	1	7	11	0	3	1
C76	0	0	0	0	0	0	0	0	0	0	0	0	0	0	0	1	0	0	0	0	0	0	0	0	0	0	0	0	0	0	0	0	0	0	0	0	0	0	0	0	0	0	0	0	0	0	0	0
C107a	0	0	0	0	0	0	0	0	1	0	0	0	0	0	0	0	0	0	0	0	0	0	0	0	0	0	0	0	0	0	0	0	0	0	0	0	0	0	0	0	0	0	0	2	0	0	0	0
C107b	0	0	0	0	0	0	0	0	0	0	0	0	0	0	1	1	0	0	0	0	0	0	0	0	0	0	0	0	0	0	0	0	0	0	0	0	0	0	0	0	0	0	0	0	0	0	0	0
C#	0	0	0	0	0	0	0	0	0	0	0	0	0	0	0	0	0	0	0	0	0	0	1	0	0	0	0	0	0	0	0	0	0	1	0	0	0	1	0	0	0	0	0	0	0	0	0	0
Cspd	0	0	0	0	0	0	0	0	0	0	0	0	0	1	0	0	0	0	0	0	0	0	0	0	0	0	0	0	0	0	0	0	0	0	0	0	0	0	0	0	0	0	0	0	0	0	0	0
C1c.C45	0	7	368	10	2	4	2	4	0	0	1	0	0	0	0	4	0	1	0	0	0	3	1	0	0	11	0	0	15	11	11	1	0	18	13	3	7	6	8	2	11	9	0	1	0	0	0	0
C9	0	0	1	0	0	0	0	0	0	0	0	0	0	0	0	0	0	0	0	0	0	0	0	0	0	0	0	0	0	0	0	0	0	0	0	0	0	0	0	0	0	0	0	0	0	0	0	0
C112	0	0	0	0	0	0	0	0	0	0	0	0	0	0	0	0	0	0	0	0	0	0	0	0	0	0	0	0	0	0	0	0	0	0	0	0	0	0	0	0	0	0	0	0	0	0	0	0
C6	0	0	4	0	4	7	19	5	4	4	7	1	3	6	2	3	2	10	9	4	2	7	4	0	3	0	0	0	0	0	0	0	0	1	2	2	1	3	5	0	1	0	8	3	6	1	1	3
C4	1	0	19	1	0	0	0	0	0	1	0	0	0	0	0	0	0	0	0	0	0	0	0	0	0	0	0	0	0	0	0	0	0	2	0	0	0	0	0	0	0	0	0	0	0	0	0	0
C91d	0	0	0	0	0	2	1	0	1	2	0	1	2	1	1	0	0	0	0	0	0	0	4	3	4	0	0	0	0	0	0	0	0	0	0	3	1	2	0	0	0	1	0	0	0	0	0	0
C91c	0	0	0	0	0	2	0	2	1	0	2	0	1	1	0	0	5	1	5	2	0	3	3	1	2	0	0	0	0	0	0	0	2	0	0	4	0	3	2	0	0	0	0	0	0	0	0	0
C91b	0	0	0	0	0	0	0	0	0	0	0	0	0	0	0	5	0	7	0	0	0	0	0	0	0	0	0	0	0	0	1	0	0	0	0	84	0	0	0	0	0	0	0	0	0	0	0	0
C91a	0	0	0	0	6	10	6	5	0	0	2	2	4	1	1	3	5	3	6	3	0	2	3	1	1	0	1	1	0	0	0	0	0	0	3	3	0	4	0	0	0	6	0	0	0	1	0	0
C66	0	0	0	0	0	0	0	0	1	0	0	0	0	0	0	0	0	0	0	0	0	0	0	0	0	0	0	0	0	0	0	0	0	0	0	0	0	0	0	0	0	0	0	0	0	0	0	0
C67	0	0	1	0	0	0	0	0	0	0	0	0	0	0	0	0	0	0	0	0	0	0	1	0	0	0	0	0	0	0	0	0	0	0	1	0	0	0	1	0	0	0	0	1	0	0	0	0
C64	0	0	0	0	0	0	0	0	2	0	0	0	0	0	0	0	0	0	0	0	0	0	0	0	0	0	0	0	0	0	0	0	0	0	0	0	0	0	0	0	0	0	0	0	0	0	0	0
C65	0	1	2	0	4	11	37	0	4	3	3	5	4	0	0	86	3	283	3	41	38	6	71	1	2	0	0	0	1	0	0	0	0	3	2	757	0	23	1	0	1	0	2	2	12	0	1	1
C62	0	0	0	0	0	3	0	0	0	1	4	1	0	0	0	2	1	0	4	0	1	2	0	0	0	0	0	0	0	0	0	0	0	0	2	0	1	0	1	0	0	0	0	1	0	0	0	1
C60	0	0	4	0	0	1	0	0	0	0	0	1	0	0	2	0	21	0	0	0	0	0	0	2	0	10	854	9	7	5	8	182	54	0	0	0	0	3	1	136	0	52	0	0	0	0	0	0
C83	0	6	0	0	42	11	19	30	45	50	13	22	24	43	46	45	44	26	71	24	43	29	88	59	77	0	0	0	0	0	2	2	0	1	0	624	9	17	11	0	0	3	0	0	1	0	0	0
C28	0	0	0	0	0	0	0	0	0	0	0	0	0	0	0	0	0	0	0	0	0	0	0	0	0	0	0	0	0	0	0	0	0	1	0	0	0	0	0	0	0	0	0	0	0	0	0	0
C2	0	0	0	0	0	0	0	0	0	0	0	0	0	0	0	0	0	0	0	0	0	0	0	0	0	0	0	0	0	0	0	0	0	0	0	0	0	0	0	0	0	2	0	0	0	0	0	0
C115a	0	0	4	0	78	114	18	45	15	20	10	8	41	16	8	6	55	33	53	18	6	65	38	12	18	0	0	0	0	0	1	0	0	2	1	1	3	34	2	0	3	0	1	1	3	3	4	1
C33.1	0	0	0	0	0	0	0	0	0	0	0	0	0	0	0	0	0	0	0	0	0	0	0	0	0	0	0	0	0	0	0	0	0	0	0	0	0	0	0	0	0	0	0	0	0	0	0	0
C3f	0	0	1	0	3	7	2	1	1	0	3	0	3	7	2	1	7	3	7	1	1	0	3	2	3	0	0	0	0	0	0	0	0	0	3	3	0	4	2	0	0	0	2	4	3	0	0	1
C46a	0	0	0	1	0	0	0	0	0	0	0	0	0	0	0	0	0	0	0	0	0	0	0	0	0	0	0	0	0	0	0	0	0	0	0	0	0	0	0	0	0	0	0	0	0	0	0	0
Cspb	0	0	0	0	4	7	2	3	0	0	3	1	1	0	0	0	5	2	3	1	1	1	3	0	1	0	0	0	0	0	0	0	0	1	1	1	1	3	0	0	0	1	0	1	1	2	1	1
C44a	0	0	0	0	0	0	0	0	0	0	0	0	0	0	0	0	0	0	0	0	0	0	0	0	0	0	0	0	0	0	0	0	0	0	0	0	0	0	0	0	0	0	0	0	0	0	0	0
C110	0	1	0	0	0	0	0	0	0	0	0	0	0	0	0	0	0	0	0	0	0	0	0	0	0	0	0	0	0	0	0	0	0	0	0	0	0	0	0	0	0	3	0	0	0	0	0	0
C120	0	9	62	0	0	0	0	0	0	0	0	0	1	0	0	0	0	0	0	0	0	0	0	0	0	6	0	0	4	0	3	0	0	0	0	0	0	0	0	3	1	0	0	0	0	0	0	0
Cspa	0	0	0	0	14	31	10	6	11	19	1	3	50	15	13	17	33	12	36	9	2	12	13	16	11	0	0	0	1	0	0	0	0	0	2	3	4	14	6	0	0	0	0	1	1	0	0	0
C71a	0	0	0	0	0	2	0	0	0	0	0	1	0	0	0	0	1	0	1	0	0	0	0	0	1	0	0	0	0	0	0	0	0	0	0	0	0	1	0	0	0	0	0	0	0	0	0	0
C94a	0	0	0	0	0	0	0	0	0	0	0	0	0	0	0	0	1	0	0	0	0	0	0	0	0	0	0	0	0	0	0	0	0	0	0	0	0	1	0	0	0	0	0	0	0	0	0	0
C19	0	0	0	0	0	0	0	0	0	0	0	0	0	0	0	0	0	0	0	0	0	0	0	0	0	0	0	0	0	0	0	0	0	0	0	0	0	0	0	0	0	1	0	0	0	0	0	0
C15.2_(type_1)	0	0	2	0	0	0	0	0	0	2	0	1	0	0	0	0	1	1	0	0	0	0	0	1	0	17	46	93	35	36	17	18	88	0	0	0	0	0	0	117	0	376	0	0	0	0	0	0
C26	0	0	0	0	0	0	0	0	0	0	0	0	0	0	0	0	0	1	0	0	0	0	0	0	0	0	0	0	0	0	0	0	0	0	0	0	0	0	0	0	0	0	0	0	0	0	0	0
C11	0	0	5	0	5	10	6	3	8	0	4	2	4	4	2	0	8	5	9	6	6	3	4	6	3	0	0	0	0	0	0	0	0	2	7	2	1	3	3	0	0	0	2	3	2	0	1	1
C10	0	0	1	0	0	0	0	0	0	0	0	0	0	0	0	0	0	0	0	0	0	0	0	0	0	0	0	0	0	0	0	0	0	0	0	0	0	0	0	0	0	0	0	0	0	0	0	0
C17	0	0	1	0	1	1	0	1	1	0	2	0	0	1	1	0	1	1	0	0	0	0	2	1	2	0	0	0	0	0	0	0	0	0	0	0	0	2	4	0	1	0	0	0	1	1	3	0
C16	0	0	19	0	4	6	2	5	2	3	6	1	1	5	2	0	3	4	8	2	3	5	5	1	2	0	0	0	0	0	0	0	0	0	3	0	1	2	0	0	0	0	1	3	0	0	0	2
C3h	0	0	0	0	3	1	2	0	1	0	1	1	0	2	1	1	0	2	0	2	1	2	4	0	3	0	0	0	0	0	0	0	0	3	0	0	0	0	0	0	3	0	0	1	1	2	3	5
C92	0	0	3	0	0	0	1	0	0	0	0	0	0	0	0	7	0	5	0	0	0	0	0	0	0	0	0	0	0	0	0	0	0	0	0	4	1	0	0	0	0	0	0	1	0	0	0	0
C90	0	0	0	0	0	0	0	0	0	0	0	2	0	0	0	0	0	1	0	0	0	0	0	0	0	0	0	0	0	0	0	0	0	0	0	0	0	0	0	0	0	0	0	0	0	0	0	0
A11	0	0	0	0	0	0	0	0	0	0	0	0	0	0	0	0	0	0	0	0	0	0	0	0	0	1	0	0	0	0	0	0	0	0	0	0	0	0	0	0	0	0	0	0	0	0	0	0
C38a	0	0	0	0	0	0	0	0	0	0	0	0	0	0	0	0	0	0	0	0	0	0	0	0	0	0	0	0	0	0	0	0	0	0	0	0	0	0	0	0	0	0	0	0	0	0	0	0
I4	0	0	0	0	0	0	0	0	0	0	0	0	0	0	0	0	0	0	0	0	0	0	0	0	0	1	0	0	0	0	0	0	0	0	0	0	0	0	0	0	0	0	0	0	0	0	0	0
D1.6	21	40	10	42	0	0	0	0	0	0	0	0	0	0	0	0	0	0	0	0	0	0	0	0	0	0	0	0	0	0	0	0	0	0	0	0	0	0	0	0	16	0	0	0	0	0	0	0
C65a	0	0	1	0	1	6	8	1	0	1	0	24	33	0	0	171	3	403	4	12	4	0	16	0	0	0	0	0	0	0	0	3	0	0	0	783	0	5	1	0	0	0	1	0	0	0	0	0
C1k	0	0	0	0	0	0	0	0	0	0	0	0	0	0	0	0	0	0	0	0	0	0	0	0	0	0	0	0	0	0	0	0	0	0	0	0	0	0	0	0	0	0	0	0	0	0	0	0
C1j	0	0	2	0	0	0	0	0	0	0	0	0	0	0	0	1	0	0	0	0	0	0	1	0	0	0	0	0	0	0	0	0	0	1	1	0	0	1	0	0	0	0	0	0	1	0	0	0
C1i	0	0	2	1	1	1	0	1	0	0	2	0	1	0	1	0	3	2	0	0	6	1	4	0	0	0	0	0	0	0	0	0	0	0	0	0	0	4	1	0	0	0	0	0	0	0	0	0
C1h	0	0	6	0	0	0	0	0	0	0	0	0	0	0	0	0	0	0	0	0	0	1	0	1	0	0	0	0	0	0	0	0	0	0	1	0	0	0	0	0	0	0	0	0	0	0	0	0
C1a	0	0	21	1	2	2	1	3	4	2	4	0	6	1	0	0	11	4	6	0	0	4	3	1	6	6	0	0	2	0	1	0	0	0	3	0	0	5	2	1	1	1	0	0	2	0	0	0
C93a	7	24	190	10	4	13	1	1	3	20	1	20	0	1	71	7	185	3	1	0	14	7	3	11	5	117	50	19	401	425	67	26	80	1	2	20	2	12	14	41	13	174	4	8	6	0	6	3
C1f	0	0	3	1	2	4	1	0	0	1	11	1	0	5	1	11	3	53	5	1	0	19	2	3	3	0	0	0	0	0	0	0	1	1	15	0	0	2	31	0	119	2	0	2	1	260	495	279
C1d	4	1	10	9	6	0	0	0	0	0	0	0	0	0	1	0	0	1	0	0	4	3	0	0	0	100	0	0	2	2	3	0	0	464	186	0	0	21	2	1	4	1	0	0	0	0	0	0
A16	0	0	0	0	0	0	0	0	0	0	0	0	0	0	0	9	0	0	0	0	0	0	0	0	0	23	0	0	0	0	0	0	0	0	0	0	0	0	0	0	0	0	0	0	0	0	0	0
C1s	0	0	0	0	0	0	0	0	0	43	0	0	1	0	258	0	0	0	0	0	0	0	0	0	0	80	0	0	0	1	0	0	0	0	0	0	0	0	0	0	108	0	0	0	0	0	0	0
C1r	0	1	0	0	5	7	1	4	2	2	76	4	0	5	2	5	1	10	5	1	3	6	2	1	2	0	0	0	0	0	0	0	0	0	3	0	0	2	4	0	0	0	1	0	2	0	1	1
C1p	0	1	60	1	11	33	14	7	23	13	26	8	38	8	5	19	41	27	47	13	7	15	28	15	17	0	0	0	2	0	0	0	0	5	10	3	4	24	9	0	7	1	3	1	2	0	0	3
C1t	2	0	5	4	3	1	0	0	0	0	0	0	0	0	0	0	0	0	0	0	0	0	1	0	0	33	0	0	3	2	1	0	0	181	74	0	0	34	0	1	3	0	0	0	0	0	0	0
C80	0	0	0	0	0	3	14	0	0	0	0	0	0	0	0	0	0	0	0	15	0	0	0	0	0	0	0	0	0	0	0	0	0	0	0	0	0	0	0	0	0	0	0	0	0	0	0	0
C78a	0	0	127	2	0	0	0	0	0	0	0	0	0	0	0	0	0	1	0	0	0	0	0	0	0	1	0	0	0	0	0	0	0	18	29	5	6	16	12	0	0	0	6	18	29	0	0	0
C89	0	0	0	0	0	0	0	0	0	1	0	0	0	0	0	0	0	0	0	0	0	0	0	0	0	0	0	0	0	0	0	0	0	0	0	0	0	0	0	0	0	0	0	0	0	0	0	0
C21.b1	0	0	0	0	0	0	0	0	0	1	1	0	0	1	0	0	2	1	0	0	0	0	0	0	0	0	0	0	0	0	0	0	0	0	0	1	0	0	0	0	1	0	0	0	0	0	1	1
C94	0	0	0	0	2	4	4	5	3	0	11	6	3	2	1	18	1	57	7	3	2	8	6	1	3	0	0	0	0	0	0	1	0	1	0	4	0	6	2	0	0	0	0	1	1	1	0	0
C1.v1a	0	0	0	0	25	1	0	19	2	0	21	0	1	2	8	2	1	1	1	0	1	51	2	0	1	0	0	0	0	0	0	0	0	0	2	1	0	3	2	0	1	5	2	0	2	0	0	0
C1.v1b	0	0	2	0	0	0	0	0	0	0	1	0	0	0	0	0	0	0	0	0	0	0	0	0	0	0	0	0	0	0	0	0	0	0	0	0	0	0	0	0	0	0	0	0	0	0	0	0
D9	21	0	5	0	0	0	0	0	0	0	0	0	0	0	0	0	0	0	0	0	0	0	0	0	0	0	0	0	0	0	0	0	0	0	0	0	0	0	0	0	9	0	0	0	0	0	0	0
D7	11	1	83	0	0	0	1	0	0	0	0	0	0	0	0	9	0	5	0	4	1	0	0	0	0	0	0	0	0	0	0	0	0	0	0	0	0	0	1	0	112	0	0	0	0	0	0	0
D4	1	0	0	0	0	0	0	0	0	0	0	0	0	0	0	0	0	0	0	0	0	0	0	0	0	0	0	0	0	0	0	0	0	0	0	0	0	0	0	0	0	0	0	0	0	0	0	0
D5	17	9	9	4	0	0	0	0	0	0	0	0	0	0	0	0	0	0	0	0	0	0	0	0	0	0	0	0	0	0	0	0	0	0	0	0	0	0	0	0	10	0	0	0	0	0	0	0
D3	9	16	4	16	0	0	0	0	0	0	0	0	0	0	0	0	0	0	0	2	0	0	0	0	0	0	0	0	0	0	0	0	0	0	0	0	0	0	0	0	9	0	0	0	0	0	0	0
